# Supplementary figures and images for: Valorization of Honduran Agro-Food Waste to Produce Bioplastics
Source: MDPI journal article supplement (doi:10.3390/polym15122625), 2023-06-09

## Supplementary material

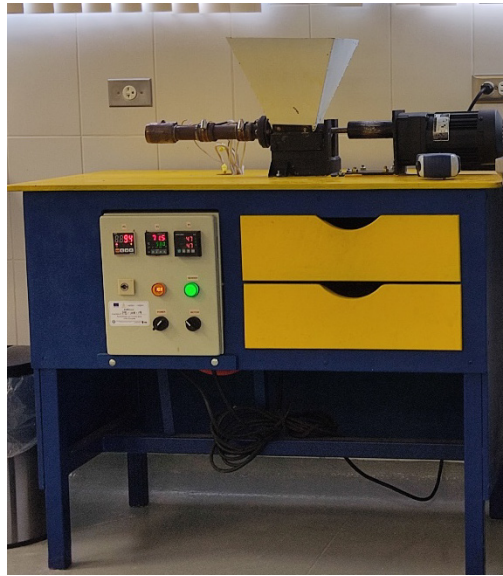

**Figure S1.** In-house manufactured extruder.

Supplement: s1 [file s1]
